## ***A CENH3 mutation promotes meiotic exit and restores fertility in SMG7-deficient Arabidopsis***

Claudio Capitao<sup>1</sup>, Sorin Tanasa<sup>2</sup>, Jaroslav Fulnecek<sup>2</sup>, Vivek K. Raxwal<sup>2</sup>, Svetlana Akimcheva<sup>1</sup>, Petra Bulankova<sup>1</sup>, Pavlina Mikulkova<sup>2</sup>, Inna Lermontova<sup>3</sup>, Ortrun Mittelsten Scheid<sup>1</sup>, Karel Riha<sup>2,\*</sup>

<sup>1</sup> Gregor Mendel Institute, Austrian Academy of Sciences, Vienna, Austria

<sup>2</sup> Central European Institute of Technology (CEITEC), Masaryk University, Brno, Czech Republic

<sup>3</sup> Leibniz Institute of Plant Genetics and Crop Plant Research, Gatersleben, Germany

\* Correspondence: [karel.riha@ceitec.muni.cz](mailto:karel.riha@ceitec.muni.cz)

Short title: Meiotic exit in Arabidopsis

### **Abstract**

Meiosis in angiosperm plants is followed by mitotic divisions to form multicellular haploid gametophytes. Termination of meiosis and transition to gametophytic development is, in Arabidopsis, governed by a dedicated mechanism that involves SMG7 and TDM1 proteins. Mutants carrying the *smg7-6* allele are semi-fertile due to reduced pollen production. We found that instead of forming tetrads, *smg7-6* pollen mother cells undergo multiple rounds of chromosome condensation and spindle assembly at the end of meiosis, resembling aberrant attempts to undergo additional meiotic divisions. A suppressor screen uncovered a mutation in centromeric histone H3 (CENH3) that increased fertility and promoted meiotic exit in *smg7-6* plants. The mutation led to inefficient splicing of the CENH3 mRNA and a substantial decrease of CENH3, resulting in smaller centromeres. The reduced level of CENH3 delayed formation of the mitotic spindle but did not have an apparent effect on plant growth and development. We suggest that impaired spindle re-assembly at the end of meiosis limits aberrant divisions in *smg7-6* plants and promotes formation of tetrads and viable pollen. Furthermore, the reduced level of CENH3 did not induce haploid plants in crosses with wild plants, indicating that differences in centromere size is not the key determinant of centromere-mediate genome elimination.

## Introduction

A sexual life cycle consisting of alternating haploid and diploid life forms is the defining feature of eukaryotes. Entry into the haploid phase requires meiosis, a reductional cell division that forms four haploid cells from a single diploid precursor. It involves segregation of homologous chromosomes in the first meiotic division that is followed, without intervening DNA replication, by segregation of sister chromatids in the second meiotic division. In contrast to the mitotic cell division machinery, meiosis requires mechanisms for tethering homologous chromosomes via recombination in prophase I, sister kinetochore monoorientation and protection of centromeric cohesion in metaphase-anaphase I, and inhibition of DNA replication in interkinesis [1, 2]. While the sequence of meiotic events is evolutionally highly conserved, regulation of meiosis and its position in the context of the life cycle differ across diverse phylogenetic units [3, 4].

Meiosis in angiosperm plants occurs in megaspore and pollen mother cells located in pistils and anthers, respectively, and leads to the formation of haploid spores. Rudimentary multicellular gametophytes carrying male and female gametes are formed by subsequent mitotic divisions. A number of genes involved in induction, progression, and termination of the meiotic program have been identified in plants. Genes required for meiotic fate acquisition and progression through early meiotic events include the transcription factor *SPOROCTELESS*, RNA binding protein *MEL2*, *AMEIOTIC1/SWITCH1*, and *RETINOBLASTOMA RELATED1* [5-8] [9]. Redox status and small-RNA-mediated gene silencing have also been implicated in establishing meiotic cell fate [10] [11, 12]. Entry into meiosis is further accompanied by the induction of genes required for core meiotic functions [13, 14].

Progression through the meiotic cell cycle is driven by cyclin dependent kinases (CDKs), in Arabidopsis mainly by CDKA;1, the key CDK that is also required for mitosis [15]. CDKA;1 plays a role in regulating meiotic spindle organization, cytokinesis, as well as recombination and chromosome pairing [16-18]. CDKA;1 activity is modulated by several mechanisms to implement the meiotic program. CDK substrate specificity is determined through association with different cyclins. Several A- and B- type cyclins are expressed in Arabidopsis pollen mother cells (PMCs) [19] and CDKA;1 was found to interact with at least three of them. SOLO DANCERS (SDS) is a meiosis-specific cyclin that mediates phosphorylation of the chromosome axis assembly factor ASYNAPTIC 1 (ASY1) and is essential for homologous recombination and pairing [16, 20]. A-type cyclin TARDY ASYNCHRONOUS MEIOSIS (TAM) and CYCB3;1 have been implicated in organization of the meiotic spindle and regulation of cell wall formation [16, 19, 21, 22]. An important aspect of meiosis is the absence of S-phase in interkinesis between meiosis I and II. In yeasts

and mammals, this is achieved via partial inhibition of the anaphase promoting complex (APC/C) after anaphase I, which results in residual CDK activity in interkinesis to prevent DNA replication. A similar mechanism was also suggested in Arabidopsis, where inactivation of the APC/C inhibitor OMISSION OF SECOND DIVISION 1 (OSD1) leads to premature meiotic exit after meiosis I [23, 24].

Two genes have been implicated in terminating the meiotic program and enabling the transition to gametophytic development in Arabidopsis. *THREE DIVISION MUTANT1 (TDM1)/MS5/POLLENLESS3* is a plant-specific gene that is exclusively expressed in meiocytes, and loss of its function results in male sterility [25-28]. Mutant PMCs fail to exit meiosis and the chromosomes of the haploid nuclei re-condense, nucleate four spindles, and attempt to undergo a third division [25, 29]. Another gene required to terminate meiosis is *SUPPRESSOR WITH MORPHOGENETIC EFFECTS ON GENITALIA7 (SMG7)*, an evolutionary conserved protein involved in nonsense-mediated RNA decay (NMD). Arabidopsis *smg7*-null mutants are NMD-deficient, exhibit stunted growth due to an upregulated immune response, and are infertile [30, 31]. The infertility is caused by meiotic arrest in anaphase II and inability to exit meiosis. Analysis of plants with a hypomorphic *smg7-6* allele that contains a T-DNA insertion in the diverged C-terminal domain of the gene indicate that the meiotic function of SMG7 is not connected to its role in NMD [32], but the mechanism of its action in meiosis remains unknown.

We reasoned that mutations that restore fertility and increase pollen count in *smg7-6* mutants might help identify genes that affect meiotic exit in Arabidopsis and therefore performed a genetic suppressor screen in this background. We identified two suppressor lines with a mutation in the *CENH3* gene, which encodes the centromeric variant of histone H3. This mutation does not alter the amino acid sequence of the protein but leads to inefficient splicing of *CENH3* mRNA and a substantial reduction of CENH3 protein levels. We describe the consequences of decreased CENH3 for meiosis, mitosis, and centromere-mediated induction of haploid plants.

## Results

### ***Meiosis in smg7-6 PMCs is followed by multiple rounds of spindle reassembly prior to polyad formation***

The multiple functions of Arabidopsis SMG7 were described in our previous studies of an allelic series of T-DNA insertion mutants in this gene [32]. The *smg7-1* and *smg7-3* alleles, disrupted in the conserved central domain, are NMD-deficient and exhibit retarded growth and defects in leaf development and shoot branching (Figure S1). In addition, *smg7-1* and *smg7-3* mutants are completely sterile (Figure

1A)[30]. In contrast, *smg7-6* mutants that contain a T-DNA insertion downstream of the conserved central domain grow normally and are only mildly deficient in NMD [31](Figure S1). Nevertheless, fertility is strongly reduced in early flowers of *smg7-6* plants, but, in contrast to *smg7-1* and *smg7-3*, some seeds are produced from late flowers. Anthers of these flowers have approximately 10-times less viable pollen than wild type plants (Figure 1A). Because the *smg7-6* phenotype differed from the one detected in *smg7-1*, we transformed the mutant with the wild-type SMG7 gene construct. This complementation restored fertility and confirmed that the sterility is indeed caused by the *smg7-6* allele (Figure S2).

Previous cytogenetic analysis performed on dissected *smg7-6* meiocytes showed PMCs seemingly arrested in anaphase II, as well as meiocytes that reached telophase II [32]. This observation can be interpreted as a reduced penetrance of the *smg7*-null phenotype in mutants with this allele, allowing occasional continuation into normal pollen development. If this were the case, one anther should contain a mixture of aberrant and normal meiocytes. To test this, we performed cytogenetic analysis of meiocytes in entire anthers. In contrast to our prediction, we observed anthers in which all meiocytes resembled aberrant anaphase II, as well as anthers with all meiocytes in telophase II (Figure 1B). This suggests that all meiocytes in *smg7-6* plants are able to reach telophase II and that the residual fertility cannot be attributed to the reduced penetrance of the phenotype observed in *smg7-1* mutant. To analyze pollen derived from the same meiocyte, we took advantage of the *Arabidopsis qrt1* mutant that is deficient in post-meiotic pollen separation, resulting in pollen tetrads that remain tethered together. Analysis of *qrt1-2 smg7-6* double mutants showed that tetrads mainly consisted of one viable and three aborted pollen (Figure 1C), eliminating the possibility that viable pollen originated from a bypass of anaphase II arrest and continuation of normal pollen development for all four products.

We next performed immunocytogenetic analysis of dissected meiocytes stained with an  $\alpha$ -tubulin antibody. We detected meiocytes containing four separate spindles, each attached to approximately five chromatids (Figure 2A). This phenotype resembles *tdm1* mutants, where haploid nuclei re-enter a third division without preceding DNA replication (Figure 2A). Nevertheless, *tdm1* and *smg7-6* mutations have slightly different phenotypes. In contrast to *smg7-6* plants, *tdm1* mutants are infertile and do not form any pollen (Figure S3A). We have also noticed that chromatids in *tdm1* mutants condense only partially during the aberrant post-meiotic division, while they fully condense in *smg7-6* plants (Figure 2B). *tdm1* is epistatic to *smg7-6* as *tdm1 smg7-6* double mutants are infertile and exhibit partially condensed chromosomes during the third meiotic division (Figure S3B).

To gain more insights into meiotic progression in *smg7-6* plants, we performed time-lapse analysis of PMCs using fluorescently labelled tubulin [22, 33]. In wild type plants, microtubules undergo two rounds of spindle formation in meiosis I and meiosis II, separated by spindle disassembly in interkinesis (Figure 3A,B; Movie S1). By tracking spindle formation, we determined the duration of metaphase I – telophase II, interkinesis, and metaphase II telophase II in wild type to be 46, 38, and 39 min, respectively, with cytokinesis ensuing 203 min after meiosis II spindle disassembly (average values from 5 meiocytes). PMCs in *smg7-6* mutants underwent up to six additional cycles of spindle assembly and disassembly beyond meiosis II (Figure 3A,C; Movies S2 and S3). We also noticed that meiosis I and II in *smg7-6* plants were extended to an average of 66 and 67 min, respectively (n = 5 meiocytes; Figure 3B). While the interkinesis II that preceded meiosis III was relatively brief (32 min), interkinesis in subsequent cycles were substantially longer (Figure 3B).

These observations indicate that *smg7-6* plants are unable to complete meiosis by regular cytokinesis. Instead, after meiosis II, *smg7-6* PMCs undergo several cycles of spindle assembly/disassembly and chromatin condensation/decondensation, leading to an unequal distribution of chromatin and formation of polyads that only exceptionally form functional haploid microspores and pollen.

#### ***Suppressor screening results in mutations that recover fertility of smg7-6 plants***

SMG7 and TDM1 are important elements of a regulatory network that governs meiotic exit in Arabidopsis [29]. To uncover additional genes and molecular processes required for transition from meiosis to pollen differentiation, we performed a forward genetic screen for mutants that restore the fertility of *smg7-6* plants. The screen is based on a characteristic feature of *smg7-6* mutants: the first 20-25 flowers on the main inflorescence bolt are infertile and only later flowers give rise to seeds (Figure 4A,B). Interestingly, pollen production is reduced in all flowers, indicating that increased fertility in late flowers is not caused by changes in the meiotic program during plant aging, but rather by unknown physiological factors that affect pollination or fertilization (Figure 4C,D). In the screen, we scored plants from the M2 population of ethyl-methanesulfonate (EMS)-mutagenized *smg7-6* plants and selected suppressor lines that produced seeds from the first 20 flowers on the main inflorescence bolt. Two suppressor lines, EMS30 and EMS155, are characterized in detail in this study.

Both lines produce seeds and substantially longer siliques from early flowers, although the siliques are still shorter than in wild type (Figure 4A,B). They also generate about 250 viable pollen per anther, which is six times more than *smg7-6* plants and approximately half of that in wild type (Figure 4C,D). While cytogenetic analysis revealed some meiocytes still undergoing a third meiotic division (Figure 5A), their

abundance substantially decreased in comparison with *smg7-6* mutants (Figure 5B). Whole anther staining showed a number of meiocytes forming tetrads, while only a relatively small fraction exhibited the aberrant third meiotic division (Figure 5C). Therefore, the aberrant exit from meiosis in *smg7-6* PMCs is at least partially suppressed in the double mutants, resulting in a relatively high level of correct tetrad formation and improved seed set.

### ***Restored fertility is caused by mutation in CENH3***

To identify the mutations responsible for the restored fertility, we created mapping populations by backcrossing EMS30 and EMS155 lines to the parental *smg7-6*. The restored fertility phenotype segregated as a recessive trait. EMS-induced *de novo* mutations were identified by comparing genome sequencing data from pools of fertile B2 plants with the parental *smg7-6* genome using the ArtMAP mapping algorithm [34]. Although EMS30 and EMS155 contained different *de novo* mutations distributed throughout their genomes, they shared one identical polymorphism in the CENH3 gene at the end of the left arm of chromosome 1 (Figure S4). The mutation was present with 100% frequency in the pools with DNA from fertile plants in the B2 populations derived from EMS30 and EMS155 lines. In both cases, the mutation represents a G to A transition in the splicing donor site of the 3<sup>rd</sup> exon of the CENH3 gene (Figure 6A). Since this mutation was uncovered independently in two suppressor lines that do not share any other *de novo* polymorphism, we consider this mutation to be responsible for the restored fertility of *smg7-6* and refer to it as the *cenh3-2* allele.

By backcrossing the double mutant suppressor line with wild type, selfing the progeny, and genotyping in the F2, we also generated a line which carries the *cenh3-2* allele independent from the *smg7-6* mutation. As a single or double mutant, the *cenh3-2* mutation causes inefficient splicing and retention of the third intron, which results in an approximately 10-fold reduction of fully spliced CENH3 mRNA (Figure 6B). Since the mis-spliced mRNA encodes a short open reading frame comprising only the first 31 amino acids of CENH3, *cenh3-2* plants have a substantially decreased amount of CENH3 protein (Figure 6C). The *cenh3-2* mutation does not affect expression of *SMG7* mRNA or the efficiency of NMD, as the abundance of an endogenous transcript containing a premature termination codon is not altered (Figure 6D,E).

CENH3 is a histone H3 variant that is specifically localized to centromeres. In Arabidopsis, CENH3 is loaded onto centromeres during G2 and remains there throughout the cell cycle [35]. To determine whether CENH3 is present on centromeric chromatin in *cenh3-2* mutants, we performed immunolocalization using a CENH3 antibody. In wild type plants, we readily detected ten discrete dots in tapetum nuclei that likely correspond to ten centromeres, and approximately five pronounced dots in pachytene meiocytes that

reflect synapsed centromeres of paired homologous chromosomes (Figure 7A, Figure S5). In contrast, no signals were detected when we used the same imaging conditions in *cenh3-2* mutants (Figure S5). Substantially increasing the exposure time revealed weak fluorescence at DAPI-dense regions, indicating limiting amounts of CENH3 at the centromeres (Figure 7A). This was further validated by chromatin immunoprecipitation in seedlings that showed association of CENH3 with the Arabidopsis centromeric satellite repeat CEN180 in *cenh3-2* plants, albeit at a lower level compared to wild type (Figure 7B,C). Thus, the *cenh3-2* mutation substantially reduces the amount of CENH3 in centromeric chromatin.

CENH3 forms a hub for binding kinetochore proteins during chromosome segregation. Therefore, we next performed immunolocalization in *cenh3-2* nuclei for CENP-C, a key protein of the inner kinetochore complex [36], and KNL2, a CENH3 assembly factor [37]. CENP-C and KNL2 signals in *cenh3-2* root nuclei were substantially lower than in wild type (Figure 8), suggesting that the decreased amount of CENH3 in the mutant affects the kinetochore structure.

### ***cenh3-2* affects mitotic progression and chromosome segregation**

Considering the role of CENH3 in chromosome segregation not only during meiosis, but also during the mitotic cell cycle and progression through M-phase, it was striking that the somatic growth of *cenh3-2* plants was hardly affected, despite a drastically reduced level of CENH3. Mutant plants are viable, fertile, and do not show any gross growth retardation (Figure 4A). More thorough examination revealed that the roots of *cenh3-2* mutants grow slower when cultivated on agar plates (Figure 9A,B), which is indicative of impaired cell division. To reveal whether mitosis is affected in *cenh3-2* plants, we performed live imaging of mitotic progression in root cells expressing the *HTA10:RFP* chromatin marker [33]. We determined the duration of early mitosis from nuclear envelope breakdown (NEB) through prometaphase to the end of metaphase, and of anaphase from chromatid separation to their arrival at the final position within the dividing cell (Figure 9C). We noticed that the duration of prometaphase/metaphase is approximately twice as long in *cenh3-2* mutants as in wild type, whereas anaphase is unaffected (Figure 9D, Movies S4 and S5, Table 1).

A prolonged prometaphase indicates problems with chromosome biorientation and the formation of a bipolar spindle. Therefore, we next examined whether mitosis in *cenh3-2* mutants is sensitive to oryzalin, a dinitroaniline herbicide that disrupts polymerization of microtubules [38]. We found that treatment of roots with 1.5  $\mu$ M oryzalin has a relatively mild effect on mitotic progression in wild type, causing extension of the prometaphase from 10 to 14 min, which was followed by a normal anaphase (Figure 9D, Table 1, Movie S6). However, the same concentration of oryzalin inhibited chromosome biorientation and

formation of a stable metaphase plate in *cenh3-2* mutants. All scored cells entering mitosis remained arrested in prometaphase and did not reach anaphase even after 1 hr of recording (Table 1, Movie S7). The increased sensitivity to a microtubule inhibitor indicates that association of kinetochores with microtubules is impaired in *cenh3-2* plants.

### ***The cenh3-2 allele does not promote the formation of haploid plants in crosses with wild type***

Interference with CENH3 function through structural rearrangements in the N-terminal tail or amino acid substitutions in the conserved histone fold domain was shown to induce chromosome elimination and formation of haploid plants in Arabidopsis F1 crosses with wild type plants [39-42]. Some of the mutations were reported to decrease CENH3 levels, which suggested that downregulation of CENH3 could be sufficient to induce formation of haploid plants upon outcrossing [40, 43]. To test this hypothesis, we pollinated *cenh3-2* mutants with pollen from trichomeless *gl1-1* plants. Haploid plants with this recessive mutant allele would be easily scored by their smooth leaf surface, in contrast to rough leaves in diploid hybrids. Out of 500 F1 plants, we identified only a single haploid plant validated by flow cytometry (Figure S6). The frequency of haploid offspring (0.2%) in *cenh3-2* crosses is much lower than frequencies reported with mutations that alter the CENH3 amino acid sequence [39-42], suggesting that the decreased amount of CENH3 in *cenh3-2* mutants is insufficient to trigger uniparental genome elimination in Arabidopsis.

## **Discussion**

Transition from meiosis to post-meiotic differentiation of haploid gametophytes is governed by a dedicated mechanism that requires the nonsense-mediated RNA decay factor SMG7 [30]. So far, the only molecular function assigned to SMG7 was related to NMD, where SMG7 binds to phosphorylated UPF1 via its N-terminal phosphoserine binding domain and mediates re-localization of UPF1-bound RNA to P-bodies [44]. In vertebrates, the C-terminal region of SMG7 further associates with the CCR4-NOT deadenylase to degrade aberrant mRNA. This mechanism also appears to be conserved in plants [45] [46]. Nonetheless, two lines of evidence argue that the meiotic function of SMG7 in Arabidopsis is not implemented through NMD. First, Arabidopsis UPF1-deficient plants are more impaired in NMD than SMG7-null mutants [47], but they do not show a meiotic phenotype and produce viable pollen [32]. Second, the hypomorphic *smg7-6* allele carrying a T-DNA insertion in the C-terminal region is NMD-proficient, but still exhibits meiotic defects [31, 32]. We therefore conclude that SMG7 has an additional role in regulating meiotic exit, at least in the male pathway.



We previously proposed that SMG7 directly or indirectly contributes to the downregulation of CDK activity at the end of meiosis [29]. Processes required for chromosome segregation, such as nuclear envelope breakdown, chromosome condensation, and spindle formation are driven by increasing activity of M-phase CDKs. Degradation of M-phase cyclins by the APC/C in anaphase and downregulation of CDKs revert these processes and allow cytokinesis, exit from the M-phase, and licensing of origins of replication for DNA synthesis in the next S-phase [48, 49]. If CDK activity is not irreversibly downregulated, untimely chromosome re-condensation, spindle reassembly, and re-initiation of chromosome segregation might be consequences, as seen in *tdm1* and *smg7-6*. The complete lack of pollen in *tdm1* versus low numbers of viable pollen grains in *smg7-6* could originate from differences in the degree of re-condensation: less condensed chromatin in *tdm1* in the third division might preclude the formation of any chromosome cluster that would result in a functional microspore, while slightly stronger chromosome condensation at the respective state in *smg7-6* could increase the chance of encapsulating the right chromosome combination for the occasional formation of viable pollen.

This residual fertility in *smg7-6* permitted a suppressor screen to identify genes whose mutations affect meiotic exit in Arabidopsis and increase production of viable pollen and seeds. Identifying a mutation, twice independently, in the gene for centromeric histone CENH3 that partially rescues infertility of *smg7-6* plants came as a surprise. CENH3 is the key determinant of centromeric chromatin and kinetochore assembly. Its inactivation in Arabidopsis is embryonic lethal [39], and RNAi-mediated knock down of *CENH3* mRNA to 27-43% of the wild type level was reported to cause dwarfism and severe developmental defects [50]. Although the *cenh3-2* mutation leads to a 10-fold reduction of fully spliced *CENH3* mRNA and depletion of CENH3 from centromeres, mutant plants do not exhibit growth abnormalities under standard conditions and are fully fertile. Immunolocalization of CENH3 and the inner kinetochore proteins CENP-C and KNL2 suggest that centromeres and kinetochores are smaller in *cenh3-2* plants compared to wild type. These data indicate that plants can tolerate a substantial decrease of CENH3 level and centromere size. This has also been shown for centromeres on supernumerary B-chromosomes in maize that retained their functionality despite being trimmed to 110 kb via chromosome fission [51].

How does the decreased level of CENH3 contribute to the restored fertility of *smg7-6* plants? The most notable cytological effect of the single *cenh3-2* mutant was delayed congression of mitotic chromosomes to the metaphase plate, suggesting less efficient establishment of a stable bipolar spindle. Chromosome congression and the bipolar spindle are formed by a search-and-capture mechanism in which microtubules initially establish lateral contacts with kinetochores that are later transformed into more

stable attachments to the plus ends of microtubules [52, 53]. The small kinetochores in *cenh3-2* mutants may decrease the efficiency of kinetochore-microtubule interaction and increase the time required for spindle formation. Such size-dependent attachment of kinetochores was predicted by computational modelling [53] and supported by the observation that chromosomes with larger kinetochores acquire bi-polar orientation faster than chromosomes with smaller kinetochores [54]. Smaller kinetochores in the *cenh3-2 smg7-6* double mutant PMCs could therefore reduce the degree or speed of aberrant meiotic divisions compared to *smg7-6* single mutant plants. We propose that inefficient formation of centromere-microtubule interactions hinders spindle reassembly, re-entry into aberrant rounds of chromosome segregation, and thereby allows more efficient formation of viable pollen and higher fertility.

Centromere-mediated genome elimination is a promising strategy for inducing haploid plants for various breeding applications [55]. This technology was developed in *Arabidopsis* where all chromosomes of mutants with structurally altered CENH3 are eliminated upon crossing with wild type [39-41, 56]. The underlying mechanism is assumed to be based on postzygotic incompatibility, whereby the parental chromosome set with the structurally altered CENH3 at its centromeres is mitotically unstable and therefore is left behind in early embryonic divisions [39, 57, 58]. It was hypothesized that CENH3 mutations may impair chromatin loading, forming smaller centromeres that cannot compete with the larger centromeres of the crossing parent [43], causing early loss of chromosomes due to size dimorphism of parental centromeres. Indeed, genome elimination can be induced in crosses between species with centromeres of different size, and by a CENH3 mutation that affects centromere loading [40, 43]. Furthermore, haploid plants were generated in crosses with maize heterozygous for a *cenh3* null mutation, suggesting that dilution of CENH3 during gametophytic divisions can render centromeres smaller or dysfunctional [59]. However, the substantially reduced level of CENH3 that, according to the immunocytological data, results in smaller centromeres and impaired mitotic spindles, was not efficient in haploid induction, at least in *Arabidopsis cenh3-2* mutants. Notably, a comparably low frequency of *Arabidopsis* haploids was found after reducing the amount of wild-type CENH3 through female gametogenesis in plants heterozygous for the *cenh3-1* null mutation [60]. Also in wheat, multiple knock-outs of homeologous CENH3 genes are insufficient to induce haploid plants unless combined with a hypomorphic mutation containing a short deletion in the CENH3 N-terminal domain [61]. Thus, the efficiency of centromere-mediated genome elimination may depend on the extent and combined effects of qualitative and quantitative changes in centromere structure.

## Methods

### ***Plant material and growth conditions***

*Arabidopsis thaliana* ecotype Columbia (Col-0) and mutant seeds were grown on soil in growth chambers at 21°C at 50-60% humidity under 16 h/8 h light/dark cycles. The following mutant lines were used in this study: *smg7-6* [32], *smg7-1*, *smg7-3* [30], *gl1-1* derived from *tert* line [62]. The *tdm1-4* mutant was obtained from NASC (SALK\_123139) and PCR-genotyped using PCR primers described in Table S1. Plants used for live cell imaging were generated by introgression of reporter constructs from *HTA10:RFP* [33] and *pRPS5A::TagRFP:TUB4* [22] lines. Root growth assay was performed by growing surface-sterilized seeds on vertically oriented MS agar plates (0.7% plant agar, Duchefa Biochemie) at 21°C under 16 h/8 h light/dark photoperiods. The position of the root tip was marked 5, 8 and 10 days after germination to determine the root growth rate.

### ***Assessment of plant fertility***

Pollen viability was determined by Alexander staining as described [63]. Silique length was measured when apical meristems ceased forming new flowers. Average silique length was calculated at each position for the first 40 siliques along the main inflorescence bolt (numbered with 1 for the oldest and 40 for the youngest silique).

### ***Genetic screening***

Seeds from *smg7-6* plants were incubated in 50 ml of water at 4°C overnight. Water was replaced with 50 ml of 0.3% (v/v) ethyl-methanesulfonate (EMS) in water and incubated for 8 h at room temperature in the dark with gentle shaking. The EMS solution was replaced with water and the seeds were incubated for 3 days at 4°C in the dark. Twelve seeds were sown per pot (9x9 cm) and M2 seeds were pooled from all plants in one pot. Around 100 M2 seeds from each pool were grown and manually scored for improved fertility compared to *smg7-6* mutants grown in parallel. The genetic transmissibility of restored fertility was confirmed in the M3 generation and M3 plants were backcrossed to the parental *smg7-6* line to create B2 mapping populations. Inflorescences from segregants with improved fertility in B2 were pooled (at least 50 plants per line) for DNA extraction using the CTAB (cetyltrimethyl ammonium bromide) method [64]. DNA (2 µg) was sheared in a S220 Focused-ultrasonicator (Covaris), DNA fragments were purified using the DNA Clean & Concentrator™-5 kit (Zymo Research), and quantified using the Quant-iT™ PicoGreen™ dsDNA Reagent (Thermo Fisher Scientific). After analyzing the samples for proper fragmentation (~150 bp) in an Agilent 2100 Bioanalyser System (Agilent Technologies), DNA libraries were

prepared using 300 ng of fragmented DNA following the instructions of the NEBNext® Ultra™ II DNA Library Prep kit (New England Biolabs). Samples were sequenced on a HiSeq 2500 (Illumina) with the sequencing output of single ends with 100 nucleotides in size. Mutations associated with improved fertility were identified using ArtMAP software [34]. For further genetic experiments, the identified *cenH3-2* mutation was PCR-genotyped by the Derived Cleaved Amplified Polymorphic Sequences (dCAPS) method using primers described in Table S1. The PCR product was cleaved with *Pst*I and separated in 2% (w/v) high-resolution agarose in TBE buffer. The amplicon of the wild type allele remained uncleaved with a size of 222 bp, while that of the *cenH3-2* allele was cut into 188 bp and 34 bp fragments.

### **Cytology**

Staining of PMCs in whole anthers was performed as previously described [65] with the following modifications: inflorescences were fixed in PEM buffer (50 mM Pipes pH 6.9, 5 mM EGTA pH 8.0, 5 mM MgSO<sub>4</sub>, 0.1% Triton X100) supplemented with 4% formaldehyde by 15 min vacuum infiltration and 45 min incubation at room temperature. Inflorescences were washed 3x with PEM buffer and buds smaller than 0.6 mm were dissected, transferred to 100 µl of PEM supplemented with DAPI (5 µg/ml), and stained for 1 h in the dark. Anthers were washed twice with 1 ml of PEM buffer for 5 min, then incubated in PEM buffer at 60°C for 10 min and at 4°C for 10 min. Anthers were washed once, mounted in Vectashield (Vector Laboratories), covered with cover slips, and examined on an LSM700 or LSM880 confocal microscope (Zeiss). Immunodetection of microtubules in pollen mother cells was performed using rat anti- $\alpha$ -tubulin antibody (Serotec) as previously described [29]. The same protocol was applied to detect CENH3 with a custom-made (LifeTein, <https://www.lifetein.com>) polyclonal antisera raised against the N-terminal peptide of CenH3 [66] and anti-Rabbit-Alexa Fluor 488 (ThermoFisher Scientific). KNL2 and CENP-C were detected in root nuclei as previously described [67] using custom made anti-AtKNL2 [37] or anti-AtCENP-C antibodies (<http://www.eurogentec.com/>) [50] and goat anti-rabbit rhodamine (Jackson Immuno Research Laboratories). DNA content in nuclei of haploid plants was determined by flow cytometry as previously described [68].

### **Live cell imaging**

Live cell imaging of spindles in PMCs was performed with the *pRP55A::TagRFP:TUB4* marker [22] using a protocol developed for light sheet microscopy [33]. Briefly, the floral buds were embedded in 5MS (5% sucrose + ½ MS, Murashige & Skoog Medium including vitamins and MES buffer, Duchefa Biochemie) supplemented with 1% low gelling agarose (Sigma Aldrich) in a glass capillary (size 4, Brand). The capillary was mounted in the metal holder of the Light sheet Z.1 microscope (Zeiss), the agarose with the

embedded floral bud was partially pushed out from the glass capillary into the microscopy chamber containing 5MS media, and imaged in Light sheet Z.1 microscope using 10x objective (Detection optics 10x/0.5), single illumination (Illumination Optics 10x/0.2), 561 nm laser (15 % intensity) in 5min time increments. The image data were processed by ZEN Blue software (Zeiss). Live cell imaging of mitosis in roots was performed with the *HTA10:RFP* marker as follows: surface-sterilized seeds were germinated on 1 ml of ½ MS medium with 0.8% phyto-agar (Duchefa Biochemie) in petri dishes with a glass bottom (MatTek corporation). Once growing roots reached the glass bottom, they were imaged with an LSM780 inverted confocal microscope (Zeiss, 40x objective) in 1 min intervals. Two ml of 2 µM oryzalin solution were added to plates 10 min before imaging. Images were processed using Zen Black (Zeiss).

### ***Chromatin immunoprecipitation***

ChIP experiments were performed from 10 day old seedlings according to a previously described protocol [69]. Five µl of anti-histone H3 antibody (1 mg/ml; ab1791; Abcam), and 10 µl of anti-CENH3 antibody were used. Detection of centromeric 180 bp satellite DNA was performed by dot-blot hybridization as well as by qPCR. For dot-blot hybridization, 40 µl from 50 µl samples were combined with 10 µl of MILI-Q water and 6 µl of 3 M NaOH, incubated for 1 h at 65°C and dot-blotted on Amersham Hybond™-XL membrane (GE Healthcare). DNA was fixed by UV using a UV crosslinker BLX-254 (Analytik Jena). After prehybridization at 65°C for 2 h in hybridization buffer (7% SDS, 0.25 M sodium-phosphate buffer pH 7.2), membranes were hybridized at 65°C overnight with denatured probes generated by Klenow-labeling of an Arabidopsis centromere 180 bp satellite fragment with α<sup>32</sup>P dATP (DecaLabel DNA Labeling Kit, Thermo Scientific). The fragment was prepared by PCR amplification of Arabidopsis genomic DNA using the primer combination CEN-1 ATCAAGTCATATTCGACTCCA and CEN-2 CTCATGTGTATGATTGAGAT, followed by purification (NucleoSpin Gel and PCR Clean-up, Macherey-Nagel). Membranes were washed twice with 2x SSC, 0.1% SDS at RT for 5 min and twice with 0.2x SSC, 0.1% SDS at 65°C for 15 min. Membranes were wrapped in Saran wrap and exposed to a phospho-screen which was scanned with a Typhoon FLA 7000 (GE Healthcare). Signals were quantified using ImageQuant software (GE Healthcare). For qPCR quantification, 1 µl from 50 µl samples was used in a 20 µl qPCR reaction containing 1x LightCycler 480 High Resolution Melting Master mix, 3 mM MgCl<sub>2</sub>, and 0.25 µM of each primer CEN-f CCGTATGAGTCTTTGGCTTTG and CEN-r TTGGTTAGTGTTTGGAGTCG. Reactions were performed in technical triplicates and quantified as percent of input.

### **Western blot analysis**

For nuclei purification, 300 mg of inflorescences were collected in 15 ml Falcon tubes, frozen in liquid nitrogen, and homogenized with metal beads by vortexing. The disrupted tissue was resuspended in 5 ml of nuclei isolation buffer (NIB) (10 mM MES-KOH pH 5.3, 10 mM NaCl, 10 mM KCl, 250 mM sucrose, 2.5 mM EDTA, 2.5 mM  $\beta$ -mercaptoethanol, 0.1 mM spermine, 0.1 mM spermidine, 0.3% Triton X-100), and filtered through two layers of Miracloth into a 50 ml Falcon tube. Nuclei were pelleted by centrifugation, resuspended in 1 ml NIB and collected again by centrifugation. The pellet was resuspended in 150  $\mu$ l of N buffer (250 mM sucrose, 15 mM Tris-HCl pH 7.5, 60 mM KCl, 15 mM NaCl, 5 mM MgCl<sub>2</sub>, 1 mM CaCl<sub>2</sub>, 1 mM DTT, 10 mM  $\beta$ -glycerophosphate, protease inhibitors). Nuclei were lysed by adding 40  $\mu$ l 5x Laemmli loading buffer (Sigma) and boiling for 5 min. 40  $\mu$ g of nuclear protein was separated by SDS-polyacrylamide gel electrophoresis. Separated proteins were transferred to PVDF membranes (Thermo Scientific) by electroblotting. The membranes were incubated in low-fat milk with rabbit anti-CENH3 antibody (1:5,000; ab72001; Abcam) for 12 h at 4°C. Secondary anti-rabbit-HRP conjugated antibody was diluted (1:5000) and incubated for 2 h. TBST (25 mM Tris-Cl, pH 7.5, 150 mM NaCl, 0.05% Tween-20, pH 7.5) was used to wash the membranes and the signal was detected using ECL Western Blotting Substrate (Pierce).

### **RNA analysis**

RNA was isolated from inflorescences using the RNeasy Plant Mini Kit (Qiagen). Samples were treated with TURBO DNA-free Kit (Ambion) to remove contaminants from genomic DNA. cDNA was synthesized from 5  $\mu$ g of RNA with the Maxima H Minus First Strand cDNA Synthesis Kit (Thermo Scientific) and oligo (dT)18 primer. cDNA was used as a template for quantitative PCR reactions using the FastStart Essential DNA Green Master (Roche) and transcript-specific primer pairs (Table S1) on the LightCycler® 96 System (Roche). The  $\Delta\Delta$ Ct method was used to calculate the relative quantification of transcripts [70]. MON1 (AT2G28390) was used as reference gene, and transcript levels for each genotype were normalized to wild type controls.

### **Acknowledgement**

We thank to Arp Schnittger for providing the *pRPS5A::TagRFP:TUB4* line, Sona Valuchova for help with image processing, and Andreas Houben for helpful discussion. This work was supported from the European Regional Development Fund-Project 'REMAP' (No. CZ.02.1.01/0.0/0.0/15\_003/0000479 to K.R.), Doctoral School "Chromosome Dynamics" of the Austrian Science Fund (FWF W1238 to K.R. and O.M.S.), Vienna Science and Technology Fund (WWTF LS13-057 to O.M.S.) and the German Federal

Ministry of Education and Research (Plant 2030, Project 031B0192NN, HaploTools, to I.L.). The genome sequencing was performed by the Next Generation Sequencing Facility at Vienna BioCenter Core Facilities (VBCF), member of the Vienna BioCenter (VBC), Austria. We also acknowledge the Plant Sciences Facility at Vienna BioCenter Core Facilities (VBCF), and the Plant Sciences Core Facility of CEITEC MU for support with plant cultivation. Microscopy was performed in the BioOptics facility at the IMP, and the core facility CELLIM of CEITEC supported by MEYS CR (LM2018129 Czech-Biolmaging).

## Literature

1. Marston AL, Amon A. Meiosis: cell-cycle controls shuffle and deal. *Nat Rev Mol Cell Biol.* 2004;5(12):983-97. PubMed PMID: 15573136.
2. Petronczki M, Siomos MF, Nasmyth K. Un menage a quatre: the molecular biology of chromosome segregation in meiosis. *Cell.* 2003;112(4):423-40. PubMed PMID: 12600308.
3. Mirzaghaderi G, Horandl E. The evolution of meiotic sex and its alternatives. *Proc Biol Sci.* 2016;283(1838). Epub 2016/09/09. doi: 10.1098/rspb.2016.1221. PubMed PMID: 27605505; PubMed Central PMCID: PMC5031655.
4. Bowman JL, Sakakibara K, Furumizu C, Dierschke T. Evolution in the Cycles of Life. *Annu Rev Genet.* 2016;50:133-54. Epub 2016/09/13. doi: 10.1146/annurev-genet-120215-035227. PubMed PMID: 27617970.
5. Yang WC, Ye D, Xu J, Sundaresan V. The SPOROCTELESS gene of Arabidopsis is required for initiation of sporogenesis and encodes a novel nuclear protein. *Genes Dev.* 1999;13(16):2108-17. Epub 1999/08/31. doi: 10.1101/gad.13.16.2108. PubMed PMID: 10465788; PubMed Central PMCID: PMC316961.
6. Nonomura K, Eiguchi M, Nakano M, Takashima K, Komeda N, Fukuchi S, et al. A novel RNA-recognition-motif protein is required for premeiotic G1/S-phase transition in rice (*Oryza sativa* L.). *PLoS Genet.* 2011;7(1):e1001265. Epub 2011/01/22. doi: 10.1371/journal.pgen.1001265. PubMed PMID: 21253568; PubMed Central PMCID: PMC3017114.
7. Mercier R, Vezon D, Bullier E, Motamayor JC, Sellier A, Lefevre F, et al. SWITCH1 (SWI1): a novel protein required for the establishment of sister chromatid cohesion and for bivalent formation at meiosis. *Genes Dev.* 2001;15(14):1859-71. PubMed PMID: 11459834.

8. Pawlowski WP, Wang CJ, Golubovskaya IN, Szymaniak JM, Shi L, Hamant O, et al. Maize AME10TIC1 is essential for multiple early meiotic processes and likely required for the initiation of meiosis. *Proc Natl Acad Sci U S A*. 2009;106(9):3603-8. PubMed PMID: 19204280.
9. Zhao X, Bramsiepe J, Van Durme M, Komaki S, Prusicki MA, Maruyama D, et al. RETINOBLASTOMA RELATED1 mediates germline entry in Arabidopsis. *Science*. 2017;356(6336). doi: 10.1126/science.aaf6532. PubMed PMID: 28450583.
10. Kelliher T, Walbot V. Hypoxia triggers meiotic fate acquisition in maize. *Science*. 2012;337(6092):345-8. Epub 2012/07/24. doi: 10.1126/science.1220080. PubMed PMID: 22822150; PubMed Central PMCID: PMC4101383.
11. Nonomura K, Morohoshi A, Nakano M, Eiguchi M, Miyao A, Hirochika H, et al. A germ cell specific gene of the ARGONAUTE family is essential for the progression of premeiotic mitosis and meiosis during sporogenesis in rice. *Plant Cell*. 2007;19(8):2583-94. Epub 2007/08/07. doi: 10.1105/tpc.107.053199. PubMed PMID: 17675402; PubMed Central PMCID: PMC2002623.
12. Olmedo-Monfil V, Duran-Figueroa N, Arteaga-Vazquez M, Demesa-Arevalo E, Autran D, Grimanelli D, et al. Control of female gamete formation by a small RNA pathway in Arabidopsis. *Nature*. 2010;464(7288):628-32. Epub 2010/03/09. doi: nature08828 [pii] 10.1038/nature08828. PubMed PMID: 20208518.
13. Yuan TL, Huang WJ, He J, Zhang D, Tang WH. Stage-Specific Gene Profiling of Germinal Cells Helps Delineate the Mitosis/Meiosis Transition. *Plant Physiol*. 2018;176(2):1610-26. Epub 2017/12/01. doi: 10.1104/pp.17.01483. PubMed PMID: 29187566; PubMed Central PMCID: PMC5813559.
14. Nelms B, Walbot V. Defining the developmental program leading to meiosis in maize. *Science*. 2019;364(6435):52-6. doi: 10.1126/science.aav6428. PubMed PMID: 30948545.
15. Dissmeyer N, Nowack MK, Pusch S, Stals H, Inze D, Grini PE, et al. T-loop phosphorylation of Arabidopsis CDKA;1 is required for its function and can be partially substituted by an aspartate residue. *Plant Cell*. 2007;19(3):972-85. PubMed PMID: 17369369.
16. Sofroni K, Takatsuka H, Yang C, Dissmeyer N, Komaki S, Hamamura Y, et al. CDK-dependent activation of CDKA;1 controls microtubule dynamics and cytokinesis during meiosis. *J Cell Biol*. 2020;219(8). Epub 2020/07/02. doi: 10.1083/jcb.201907016. PubMed PMID: 32609301; PubMed Central PMCID: PMC7401817.
17. Yang C, Sofroni K, Wijnker E, Hamamura Y, Carstens L, Harashima H, et al. The Arabidopsis Cdk1/Cdk2 homolog CDKA;1 controls chromosome axis assembly during plant meiosis. *EMBO J*.



2020;39(3):e101625. Epub 2019/09/27. doi: 10.15252/embj.2019101625. PubMed PMID: 31556459; PubMed Central PMCID: PMC6996576.

18. Wijnker E, Harashima H, Muller K, Parra-Nunez P, de Snoo CB, van de Belt J, et al. The Cdk1/Cdk2 homolog CDKA;1 controls the recombination landscape in Arabidopsis. *Proc Natl Acad Sci U S A*. 2019;116(25):12534-9. Epub 2019/06/06. doi: 10.1073/pnas.1820753116. PubMed PMID: 31164422; PubMed Central PMCID: PMC6589648.

19. Bulankova P, Akimcheva S, Fellner N, Riha K. Identification of Arabidopsis meiotic cyclins reveals functional diversification among plant cyclin genes. *PLoS Genet*. 2013;9(5):e1003508. Epub 2013/05/15. doi: 10.1371/journal.pgen.1003508

PGENETICS-D-13-00024 [pii]. PubMed PMID: 23671425; PubMed Central PMCID: PMC3649987.

20. Azumi Y, Liu D, Zhao D, Li W, Wang G, Hu Y, et al. Homolog interaction during meiotic prophase I in Arabidopsis requires the SOLO DANCERS gene encoding a novel cyclin-like protein. *Embo J*. 2002;21(12):3081-95. PubMed PMID: 12065421.

21. Wang Y, Magnard JL, McCormick S, Yang M. Progression through meiosis I and meiosis II in Arabidopsis anthers is regulated by an A-type cyclin predominately expressed in prophase I. *Plant Physiol*. 2004;136(4):4127-35. PubMed PMID: 15557098.

22. Prusicki MA, Keizer EM, van Rosmalen RP, Komaki S, Seifert F, Muller K, et al. Live cell imaging of meiosis in Arabidopsis thaliana. *Elife*. 2019;8. doi: 10.7554/eLife.42834. PubMed PMID: 31107238; PubMed Central PMCID: PMC6559805.

23. d'Erfurth I, Cromer L, Jolivet S, Girard C, Horlow C, Sun Y, et al. The cyclin-A CYCA1;2/TAM is required for the meiosis I to meiosis II transition and cooperates with OSD1 for the prophase to first meiotic division transition. *PLoS Genet*. 2010;6(6):e1000989. PubMed PMID: 20585549.

24. Cromer L, Heyman J, Touati S, Harashima H, Araou E, Girard C, et al. OSD1 promotes meiotic progression via APC/C inhibition and forms a regulatory network with TDM and CYCA1;2/TAM. *PLoS Genet*. 2012;8(7):e1002865. Epub 2012/07/31. doi: 10.1371/journal.pgen.1002865

PGENETICS-D-12-00526 [pii]. PubMed PMID: 22844260; PubMed Central PMCID: PMC3406007.

25. Ross KJ, Franz P, Armstrong SJ, Vizir I, Mulligan B, Franklin FC, et al. Cytological characterization of four meiotic mutants of Arabidopsis isolated from T-DNA-transformed lines. *Chromosome Res*. 1997;5(8):551-9. PubMed PMID: 9451956.

26. Glover J, Grelon M, Craig S, Chaudhury A, Dennis E. Cloning and characterization of MS5 from Arabidopsis: a gene critical in male meiosis. *Plant J*. 1998;15(3):345-56. PubMed PMID: 9750346.

27. Sanders PM, Bui AQ, Weterings K, McIntire KN, Hsu YC, Lee PY, et al. Anther developmental defects in *Arabidopsis thaliana* male-sterile mutants. *Sex Plant Reprod.* 1999;11:297-322.
28. Cifuentes M, Jolivet S, Cromer L, Harashima H, Bulankova P, Renne C, et al. TDM1 Regulation Determines the Number of Meiotic Divisions. *PLoS Genet.* 2016;12(2):e1005856. doi: 10.1371/journal.pgen.1005856. PubMed PMID: 26871453; PubMed Central PMCID: PMC4752240.
29. Bulankova P, Riehs-Kearnan N, Nowack MK, Schnittger A, Riha K. Meiotic progression in *Arabidopsis* is governed by complex regulatory interactions between SMG7, TDM1, and the meiosis I-specific cyclin TAM. *Plant Cell.* 2010;22(11):3791-803. PubMed PMID: 21119056.
30. Riehs N, Akimcheva S, Puizina J, Bulankova P, Idol RA, Siroky J, et al. *Arabidopsis* SMG7 protein is required for exit from meiosis. *J Cell Sci.* 2008;121(Pt 13):2208-16. PubMed PMID: 18544632.
31. Capitaio C, Shukla N, Wandrolova A, Mittelsten Scheid O, Riha K. Functional Characterization of SMG7 Paralogs in *Arabidopsis thaliana*. *Front Plant Sci.* 2018;9:1602. doi: 10.3389/fpls.2018.01602. PubMed PMID: 30459790; PubMed Central PMCID: PMC6232500.
32. Riehs-Kearnan N, Gloggnitzer J, Dekrout B, Jonak C, Riha K. Aberrant growth and lethality of *Arabidopsis* deficient in nonsense-mediated RNA decay factors is caused by autoimmune-like response. *Nucleic Acids Res.* 2012;40(12):5615-24. Epub 2012/03/02. doi: gks195 [pii] 10.1093/nar/gks195. PubMed PMID: 22379136; PubMed Central PMCID: PMC3384318.
33. Valuchova S, Mikulkova P, Pecinkova J, Klimova J, Krumnikl M, Binar P, et al. Imaging plant germline differentiation within *Arabidopsis* flowers by light sheet microscopy. *Elife.* 2020;9. Epub 2020/02/12. doi: 10.7554/eLife.52546. PubMed PMID: 32041682; PubMed Central PMCID: PMC7012603.
34. Javorka P, Raxwal VK, Najvarek J, Riha K. artMAP: A user-friendly tool for mapping ethyl methanesulfonate-induced mutations in *Arabidopsis*. *Plant Direct.* 2019;3(6):e00146. Epub 2019/06/28. doi: 10.1002/pld3.146. PubMed PMID: 31245783; PubMed Central PMCID: PMC6560221.
35. Lermontova I, Schubert V, Fuchs J, Klatt S, Macas J, Schubert I. Loading of *Arabidopsis* centromeric histone CENH3 occurs mainly during G2 and requires the presence of the histone fold domain. *Plant Cell.* 2006;18(10):2443-51. doi: 10.1105/tpc.106.043174. PubMed PMID: 17028205; PubMed Central PMCID: PMC1626606.
36. Ogura Y, Shibata F, Sato H, Murata M. Characterization of a CENP-C homolog in *Arabidopsis thaliana*. *Genes Genet Syst.* 2004;79(3):139-44. Epub 2004/08/27. doi: 10.1266/ggs.79.139. PubMed PMID: 15329494.

37. Lermontova I, Kuhlmann M, Friedel S, Rutten T, Heckmann S, Sandmann M, et al. Arabidopsis kinetochore null2 is an upstream component for centromeric histone H3 variant cenH3 deposition at centromeres. *Plant Cell*. 2013;25(9):3389-404. Epub 2013/09/10. doi: 10.1105/tpc.113.114736. PubMed PMID: 24014547; PubMed Central PMCID: PMC3809539.
38. Morejohn LC, Bureau TE, Mole-Bajer J, Bajer AS, Fosket DE. Oryzalin, a dinitroaniline herbicide, binds to plant tubulin and inhibits microtubule polymerization in vitro. *Planta*. 1987;172(2):252-64. Epub 1987/10/01. doi: 10.1007/BF00394595. PubMed PMID: 24225878.
39. Ravi M, Chan SW. Haploid plants produced by centromere-mediated genome elimination. *Nature*. 2010;464(7288):615-8. PubMed PMID: 20336146.
40. Karimi-Ashtiyani R, Ishii T, Niessen M, Stein N, Heckmann S, Gurushidze M, et al. Point mutation impairs centromeric CENH3 loading and induces haploid plants. *Proc Natl Acad Sci U S A*. 2015;112(36):11211-6. Epub 2015/08/22. doi: 10.1073/pnas.1504333112. PubMed PMID: 26294252; PubMed Central PMCID: PMC4568683.
41. Kuppu S, Tan EH, Nguyen H, Rodgers A, Comai L, Chan SW, et al. Point Mutations in Centromeric Histone Induce Post-zygotic Incompatibility and Uniparental Inheritance. *PLoS Genet*. 2015;11(9):e1005494. Epub 2015/09/10. doi: 10.1371/journal.pgen.1005494. PubMed PMID: 26352591; PubMed Central PMCID: PMC4564284.
42. Kuppu S, Ron M, Marimuthu MPA, Li G, Huddleson A, Siddeek MH, et al. A variety of changes, including CRISPR/Cas9-mediated deletions, in CENH3 lead to haploid induction on outcrossing. *Plant Biotechnol J*. 2020. Epub 2020/02/26. doi: 10.1111/pbi.13365. PubMed PMID: 32096293.
43. Wang N, Dawe RK. Centromere Size and Its Relationship to Haploid Formation in Plants. *Mol Plant*. 2018;11(3):398-406. Epub 2017/12/27. doi: 10.1016/j.molp.2017.12.009. PubMed PMID: 29277426.
44. Unterholzner L, Izaurralde E. SMG7 acts as a molecular link between mRNA surveillance and mRNA decay. *Mol Cell*. 2004;16(4):587-96. PubMed PMID: 15546618.
45. Loh B, Jonas S, Izaurralde E. The SMG5-SMG7 heterodimer directly recruits the CCR4-NOT deadenylase complex to mRNAs containing nonsense codons via interaction with POP2. *Genes Dev*. 2013;27(19):2125-38. doi: 10.1101/gad.226951.113. PubMed PMID: 24115769; PubMed Central PMCID: PMC3850096.
46. Merai Z, Benkovics AH, Nyiko T, Debreczeny M, Hiripi L, Kerenyi Z, et al. The late steps of plant nonsense-mediated mRNA decay. *Plant J*. 2012. Epub 2012/09/15. doi: 10.1111/tpj.12015. PubMed PMID: 22974464.

47. Raxwal VK, Simpson CG, Gloggnitzer J, Entinze JC, Guo W, Zhang R, et al. Nonsense-Mediated RNA Decay Factor UPF1 Is Critical for Posttranscriptional and Translational Gene Regulation in Arabidopsis. *Plant Cell*. 2020;32(9):2725-41. Epub 2020/07/16. doi: 10.1105/tpc.20.00244. PubMed PMID: 32665305; PubMed Central PMCID: PMC7474300.
48. Lopez-Aviles S, Kapuy O, Novak B, Uhlmann F. Irreversibility of mitotic exit is the consequence of systems-level feedback. *Nature*. 2009;459(7246):592-5. Epub 2009/04/24. doi: 10.1038/nature07984. PubMed PMID: 19387440; PubMed Central PMCID: PMC2817895.
49. Potapova TA, Daum JR, Pittman BD, Hudson JR, Jones TN, Satinover DL, et al. The reversibility of mitotic exit in vertebrate cells. *Nature*. 2006;440(7086):954-8. PubMed PMID: 16612388.
50. Lermontova I, Koroleva O, Rutten T, Fuchs J, Schubert V, Moraes I, et al. Knockdown of CENH3 in Arabidopsis reduces mitotic divisions and causes sterility by disturbed meiotic chromosome segregation. *Plant J*. 2011;68(1):40-50. Epub 2011/06/04. doi: 10.1111/j.1365-313X.2011.04664.x. PubMed PMID: 21635586.
51. Phelps-Durr TL, Birchler JA. An asymptotic determination of minimum centromere size for the maize B chromosome. *Cytogenet Genome Res*. 2004;106(2-4):309-13. Epub 2004/08/05. doi: 10.1159/000079304. PubMed PMID: 15292608.
52. Tanaka K, Mukae N, Dewar H, van Breugel M, James EK, Prescott AR, et al. Molecular mechanisms of kinetochore capture by spindle microtubules. *Nature*. 2005;434(7036):987-94. PubMed PMID: 15846338.
53. Magidson V, Paul R, Yang N, Ault JG, O'Connell CB, Tikhonenko I, et al. Adaptive changes in the kinetochore architecture facilitate proper spindle assembly. *Nat Cell Biol*. 2015;17(9):1134-44. Epub 2015/08/11. doi: 10.1038/ncb3223. PubMed PMID: 26258631; PubMed Central PMCID: PMC4553083.
54. Drpic D, Almeida AC, Aguiar P, Renda F, Damas J, Lewin HA, et al. Chromosome Segregation Is Biased by Kinetochore Size. *Curr Biol*. 2018;28(9):1344-56 e5. Epub 2018/05/01. doi: 10.1016/j.cub.2018.03.023. PubMed PMID: 29706521; PubMed Central PMCID: PMC5954971.
55. Jacquier NMA, Gilles LM, Pyott DE, Martinant JP, Rogowsky PM, Widiez T. Puzzling out plant reproduction by haploid induction for innovations in plant breeding. *Nat Plants*. 2020;6(6):610-9. Epub 2020/06/10. doi: 10.1038/s41477-020-0664-9. PubMed PMID: 32514145.
56. Maheshwari S, Tan EH, West A, Franklin FC, Comai L, Chan SW. Naturally occurring differences in CENH3 affect chromosome segregation in zygotic mitosis of hybrids. *PLoS Genet*. 2015;11(1):e1004970.

Epub 2015/01/27. doi: 10.1371/journal.pgen.1004970. PubMed PMID: 25622028; PubMed Central PMCID: PMC4314295.

57. Sanei M, Pickering R, Kumke K, Nasuda S, Houben A. Loss of centromeric histone H3 (CENH3) from centromeres precedes uniparental chromosome elimination in interspecific barley hybrids. *Proc Natl Acad Sci U S A*. 2011;108(33):E498-505. Epub 2011/07/13. doi: 10.1073/pnas.1103190108. PubMed PMID: 21746892; PubMed Central PMCID: PMC3158150.

58. Comai L, Tan EH. Haploid Induction and Genome Instability. *Trends Genet*. 2019;35(11):791-803. Epub 2019/08/20. doi: 10.1016/j.tig.2019.07.005. PubMed PMID: 31421911.

59. Wang N, Gent JI, Dawe RK. Haploid induction by a maize cenh3 null mutant. *Sci Adv*. 2021;7(4). Epub 2021/02/02. doi: 10.1126/sciadv.abe2299. PubMed PMID: 33523932; PubMed Central PMCID: PMC7817090.

60. Marimuthu MPA, Maruthachalam R, Bondada R, Kuppu S, Tan EK, Britt A, et al. Biased removal and loading of centromeric histone H3 during reproduction underlies uniparental genome elimination. *bioRxiv*. 2021. doi: <https://doi.org/10.1101/2021.02.24.432754>.

61. Lv J, Yu K, Wei J, Gui H, Liu C, Liang D, et al. Generation of paternal haploids in wheat by genome editing of the centromeric histone CENH3. *Nat Biotechnol*. 2020;38(12):1397-401. Epub 2020/11/11. doi: 10.1038/s41587-020-0728-4. PubMed PMID: 33169035.

62. Fitzgerald MS, Riha K, Gao F, Ren S, McKnight TD, Shippen DE. Disruption of the telomerase catalytic subunit gene from *Arabidopsis* inactivates telomerase and leads to a slow loss of telomeric DNA. *Proc Natl Acad Sci U S A*. 1999;96(26):14813-8.

63. Alexander MP. Differential staining of aborted and nonaborted pollen. *Stain Technology*. 1969;44(3):117-22.

64. Clarke JD. Cetyltrimethyl ammonium bromide (CTAB) DNA miniprep for plant DNA isolation. *Cold Spring Harb Protoc*. 2009;2009(3):pdb prot5177. Epub 2010/02/12. doi: 10.1101/pdb.prot5177. PubMed PMID: 20147112.

65. Brownfield L, Yi J, Jiang H, Minina EA, Twell D, Kohler C. Organelles maintain spindle position in plant meiosis. *Nat Commun*. 2015;6:6492. doi: 10.1038/ncomms7492. PubMed PMID: 25757555.

66. Talbert PB, Masuelli R, Tyagi AP, Comai L, Henikoff S. Centromeric localization and adaptive evolution of an *Arabidopsis* histone H3 variant. *Plant Cell*. 2002;14(5):1053-66. PubMed PMID: 12034896.

67. Jasencakova Z, Meister A, Walter J, Turner BM, Schubert I. Histone H4 acetylation of euchromatin and heterochromatin is cell cycle dependent and correlated with replication rather than

with transcription. *Plant Cell*. 2000;12(11):2087-100. Epub 2000/11/23. doi: 10.1105/tpc.12.11.2087.

PubMed PMID: 11090211; PubMed Central PMCID: PMCPMC150160.

68. Derboven E, Ekker H, Kusenda B, Bulankova P, Riha K. Role of STN1 and DNA polymerase alpha in telomere stability and genome-wide replication in Arabidopsis. *PLoS Genet*. 2014;10(10):e1004682.

doi: 10.1371/journal.pgen.1004682. PubMed PMID: 25299252; PubMed Central PMCID: PMC4191939.

69. Valuchova S, Fulnecek J, Prokop Z, Stolt-Bergner P, Janouskova E, Hofr C, et al. Protection of Arabidopsis Blunt-Ended Telomeres Is Mediated by a Physical Association with the Ku Heterodimer.

*Plant Cell*. 2017;29(6):1533-45. doi: 10.1105/tpc.17.00064. PubMed PMID: 28584163; PubMed Central

PMCID: PMC5502450.

70. Livak KJ, Schmittgen TD. Analysis of relative gene expression data using real-time quantitative

PCR and the 2- $\Delta\Delta$ CT method. *Methods*. 2001. doi: 10.1006/meth.2001.1262.

Table 1

|                |                 | No oryzalin           | Oryzalin 1.5 $\mu$ M  |
|----------------|-----------------|-----------------------|-----------------------|
| Wild type      | NEB to anaphase | 10.0 $\pm$ 1.3 n = 9  | 13.8 $\pm$ 2.9 n = 13 |
|                | Anaphase        | 4.2 $\pm$ 0.7         | 4.2 $\pm$ 0.8         |
|                | No metaphase    | n. a. n = 0           | n. a. n = 1           |
| <i>cenh3-2</i> | NEB to anaphase | 20.8 $\pm$ 5.9 n = 14 | n. a. n = 0           |
|                | Anaphase        | 4.2 $\pm$ 0.7         | n. a.                 |
|                | No metaphase    | n. a. n = 0           | n. a. n = 12          |

**Table 1. Duration of mitotic phases in root cells.** None of the examined cells in *cenh3-2* roots treated with oryzalin that entered the metaphase formed a metaphase plate (n = 12).

Figure 1

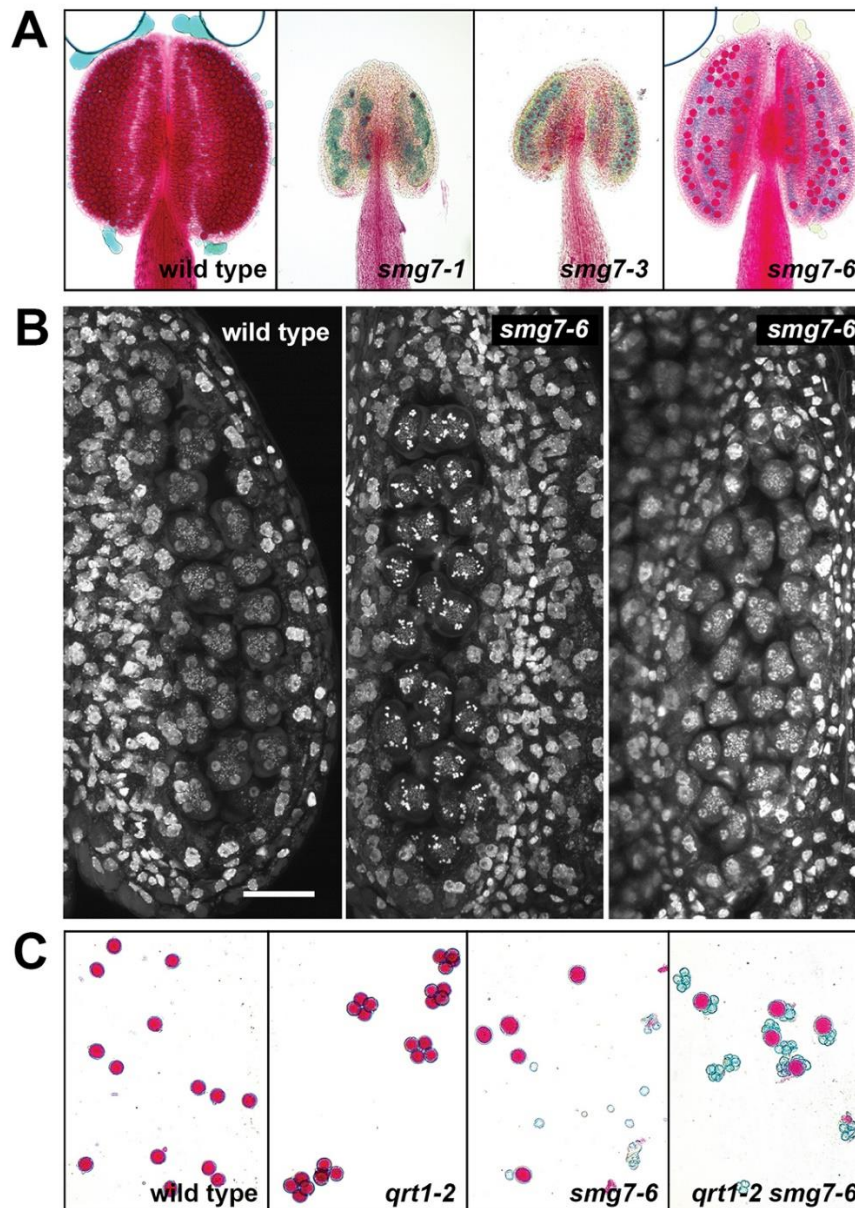

**Figure 1. Aborted pollen development in *smg7-6* mutants. (A)** Anthers of indicated mutants after Alexander staining. Viable pollen stain red. **(B)** Anther loculi in telophase II (Col-0, *smg7-6* left panel) and assumed aberrant anaphase II (*smg7-6*, middle panel) stained with DAPI. Scale bar corresponds to 20  $\mu$ m. **(C)** Alexander staining of pollen produced by the indicated mutants. The *qrt1-2* mutation causes pollen from one tetrad to remain together.



Figure 2

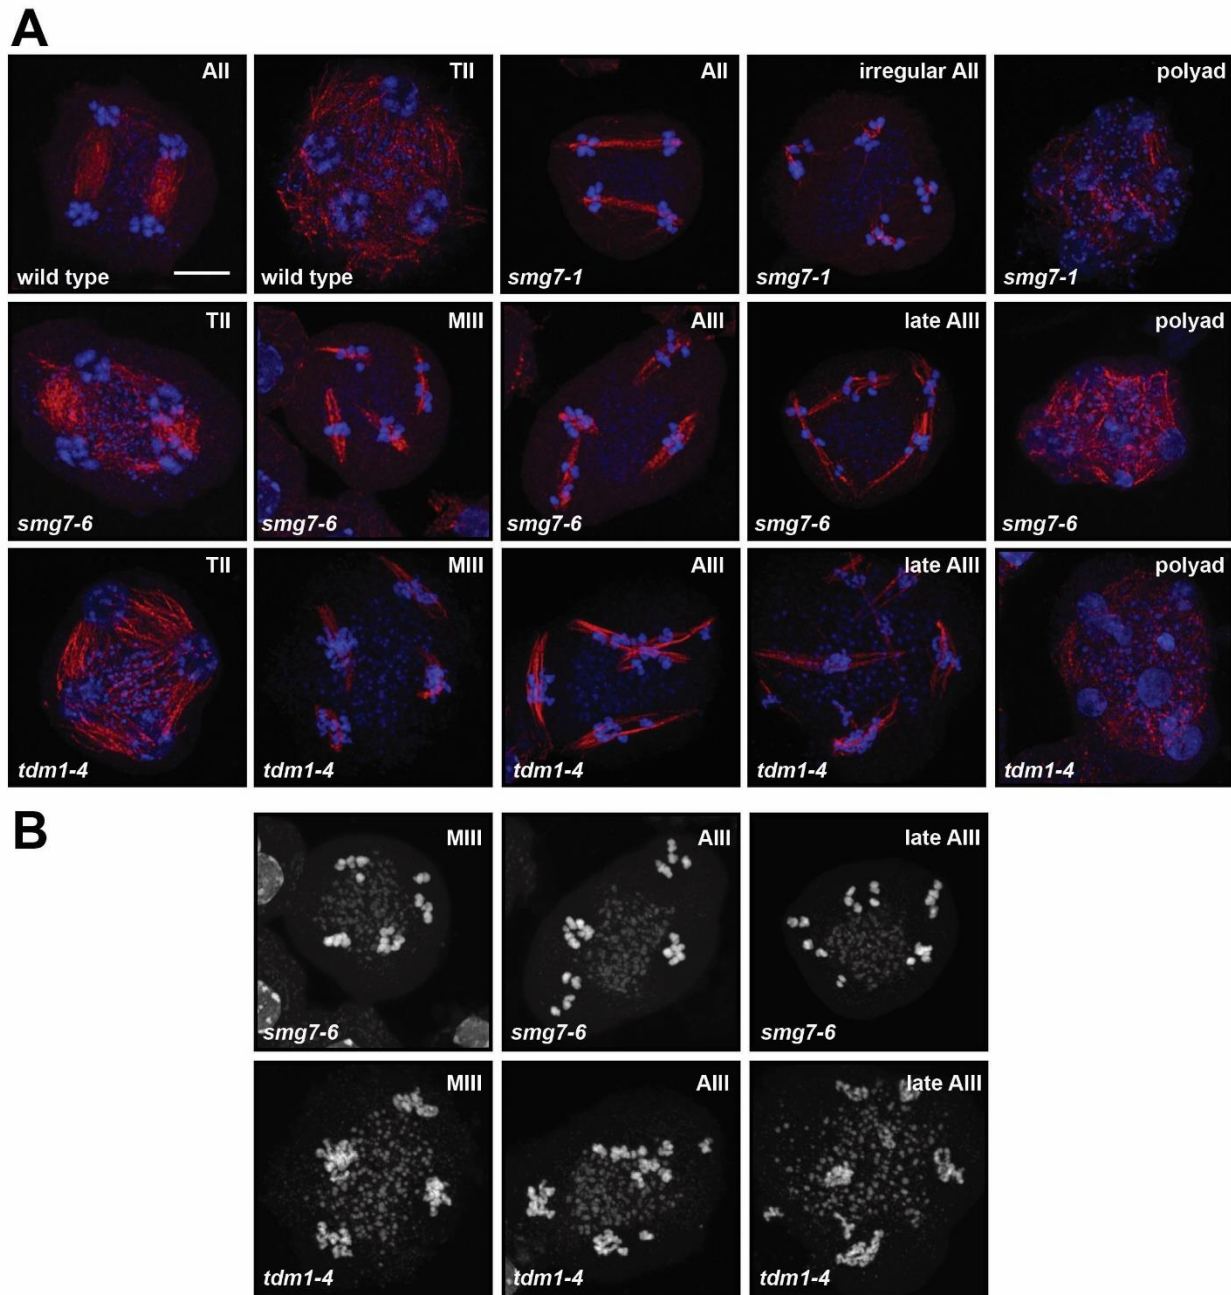

**Figure 2. Meiosis in *smg7* and *tdm1* mutants. (A)** Immunodetection of spindles using anti- $\alpha$ -tubulin antibody (red) in pollen mother cells. DNA is counterstained by DAPI (blue). All – anaphase II, TII – telophase II, MIII – metaphase III, AIII – anaphase III. **(B)** Structure of chromosomes counterstained by DAPI in the third meiotic division.

Figure 3

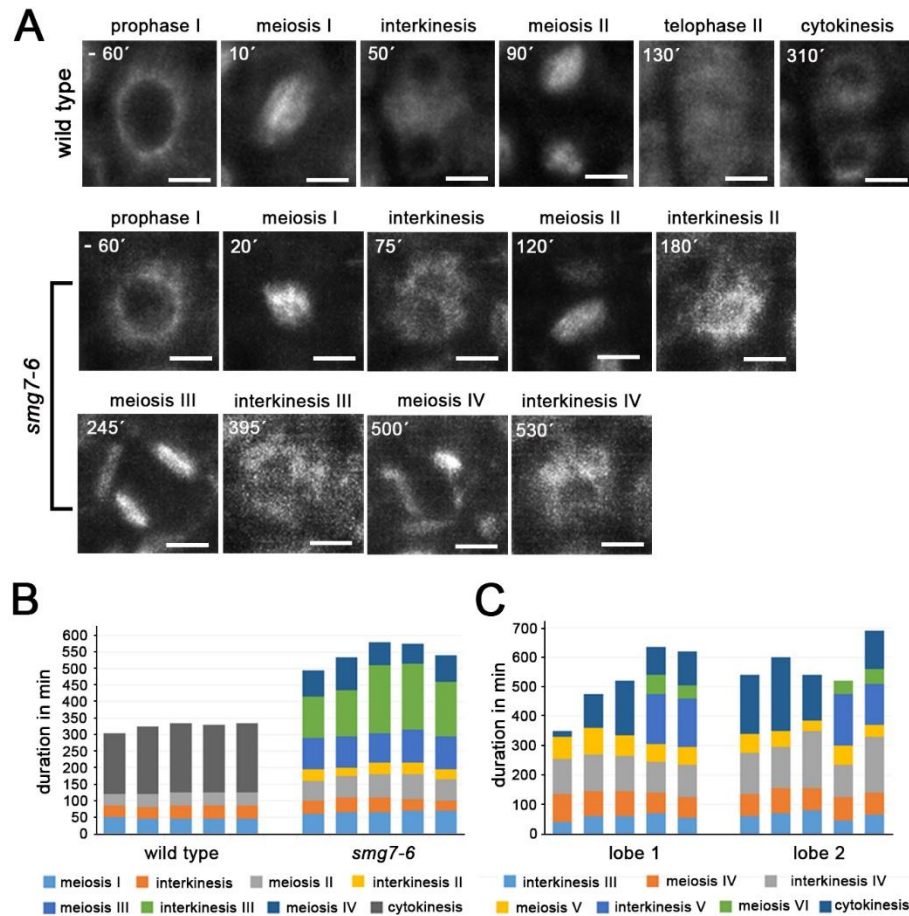

**Figure 3. Live imaging of meiotic progression in *smg7-6* PMCs. (A)** Time-lapse series of PMCs containing microtubules labeled with the pRPS5A::TagRFP:TUB4 construct. Timepoints relate to nuclear envelope breakdown at the end of prophase I. Scale bars correspond to 5  $\mu$ m. **(B)** Duration of indicated meiotic stages inferred from spindle dynamics in time-lapse movies of pRPS5A::TagRFP:TUB4. Five individual PMCs from each wild type and *smg7-6* plants are shown. **(C)** Duration of postmeiotic cycles of spindle assembly and disassembly in individual PMCs from two separate anther lobes of *smg7-6* mutants.

Figure 4

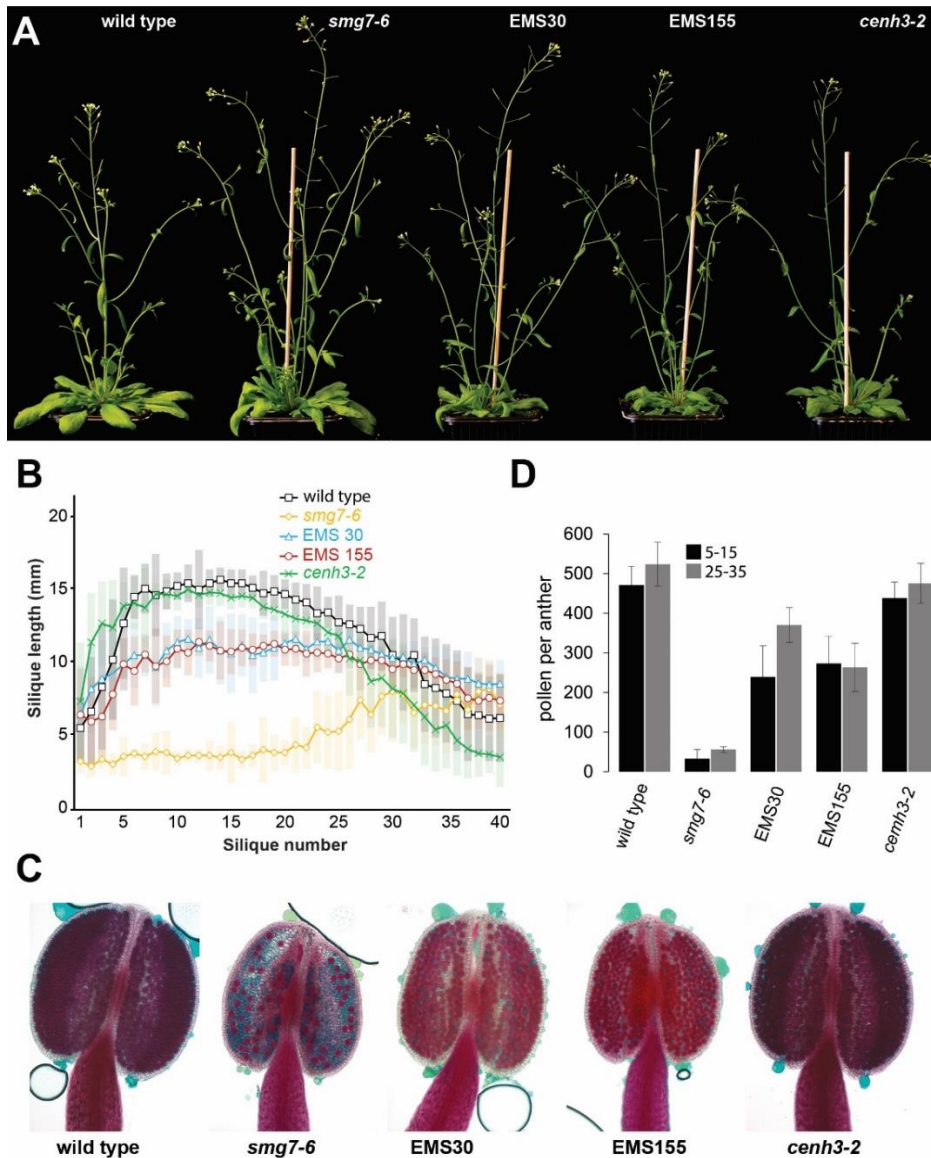

**Figure 4. Characterization of the EMS30 and EMS155 suppressor lines. (A)** Five week-old plants of indicated genotypes. **(B)** Analysis of silique length along the main inflorescence bolt in wild type (n=16), *smg7-6* (n=15), EMS30 (n=16), EMS155 (n=15) and *cenh3-2* (n=16) plants. Position 1 corresponds to the oldest and position 40 to the youngest silique scored on the main bolt. Error bars represent standard deviations. **(C)** Anthers of indicated lines after Alexander staining. **(D)** Number of viable pollen per anther from flowers at positions 5-15 and 25-35 along the main inflorescence bolt. Error bars represent standard deviations (n=9).

Figure 5

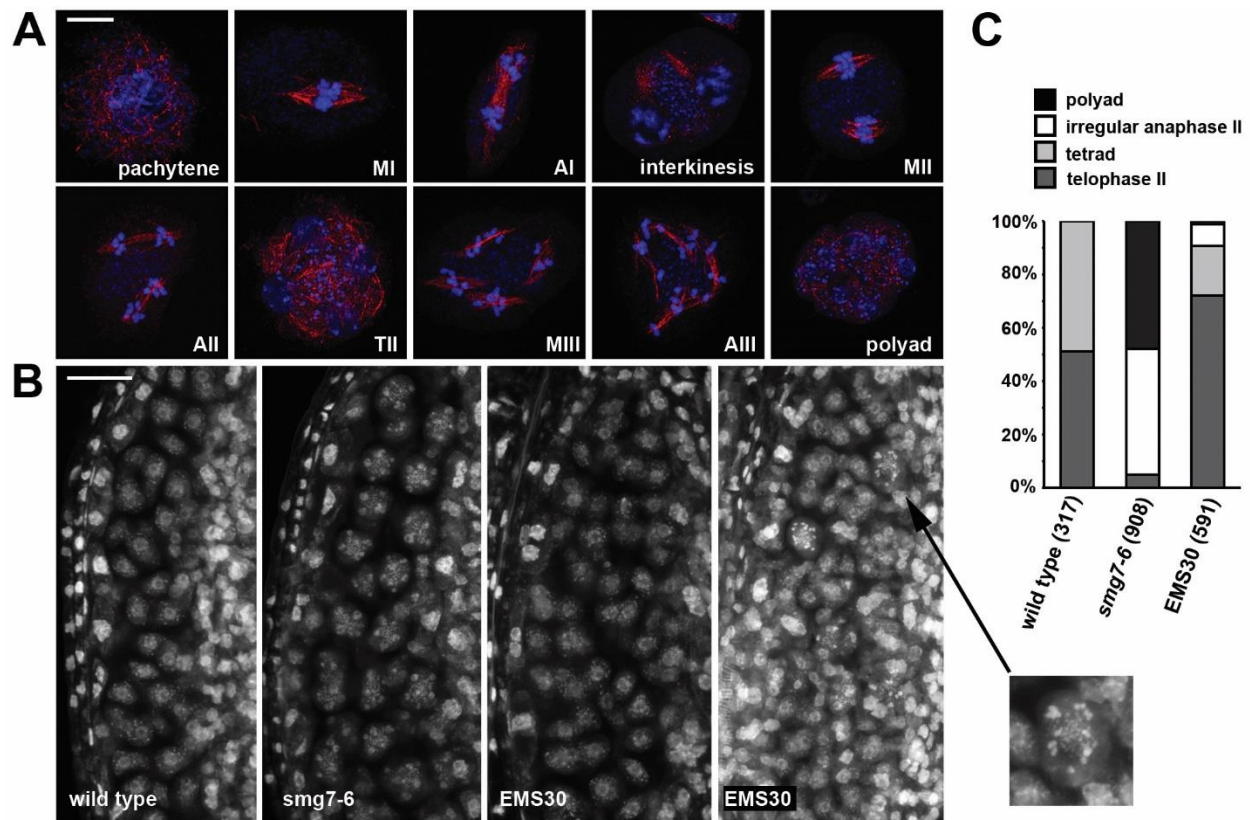

**Figure 5. Meiotic progression in the EMS30 line.** (A) Immunocytochemical analysis of EMS30 PMCs with spindles visualized with anti- $\alpha$ -tubulin antibody (red). DNA is counterstained with DAPI (blue). MI, MII, MIII – metaphase I, II, III; AI, AII, AIII – anaphase I,II, III; TII – telophase II. Scale bar represents 5  $\mu$ m. (B) Anther loculi stained with DAPI. Wild type and *smg7-6* loculi contain tetrads and polyads, respectively. EMS30 plants contain tetrads (middle panel) and a mixture of polyads, tetrads, and AIII in their loculi (right panel). The inset shows a detail of a PMC in the MIII/AIII stage. Scale bar represents 20  $\mu$ m. (C) Quantification of PMCs in late stages of meiosis. Number of PMCs analyzed for each genotype is indicated in parentheses.

Figure 6

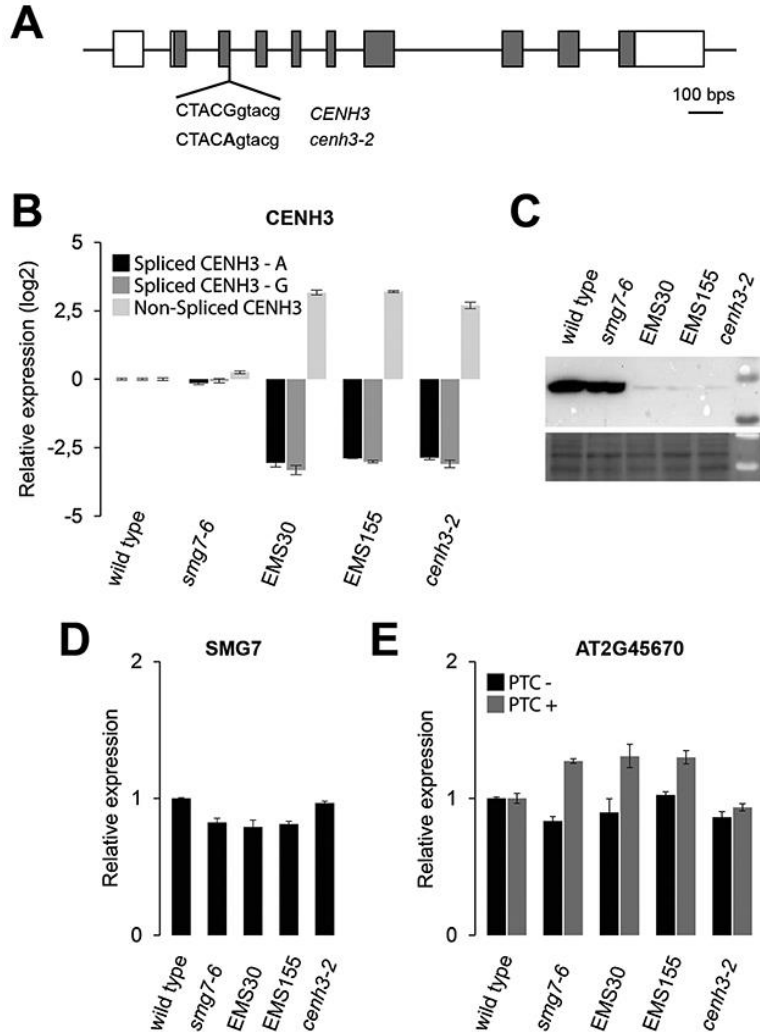

**Figure 6. Molecular characterization of the *cenH3-2* allele.** (A) Diagram of the *CENH3* gene with exons marked as boxes. The *cenH3-2* mutation at the splice donor site of exon 3 is indicated. (B) Relative abundance of spliced and unspliced *CENH3* mRNA determined by quantitative RT-PCR. Two sets of primers were designed for fully spliced mRNA matching either wild type (*CENH3-G*) or *cenH3-2* (*CENH3-A*) allele sequences. (C) Western blot detection of total *CENH3* protein by anti-*CENH3* antibody. Protein loading is shown on a Ponceau-S stained membrane (bottom panel). (D) Abundance of *SMG7* mRNA relative to wild type determined by qRT-PCR. (E) NMD efficiency assessed by qRT-PCR analysis of alternatively spliced variants of the *AT2G45670* gene with or without a premature termination codon (PTC) relative to wild type. Error bars in (B), (D) and (E) represent standard deviations from 3 biological replicas.

Figure 7

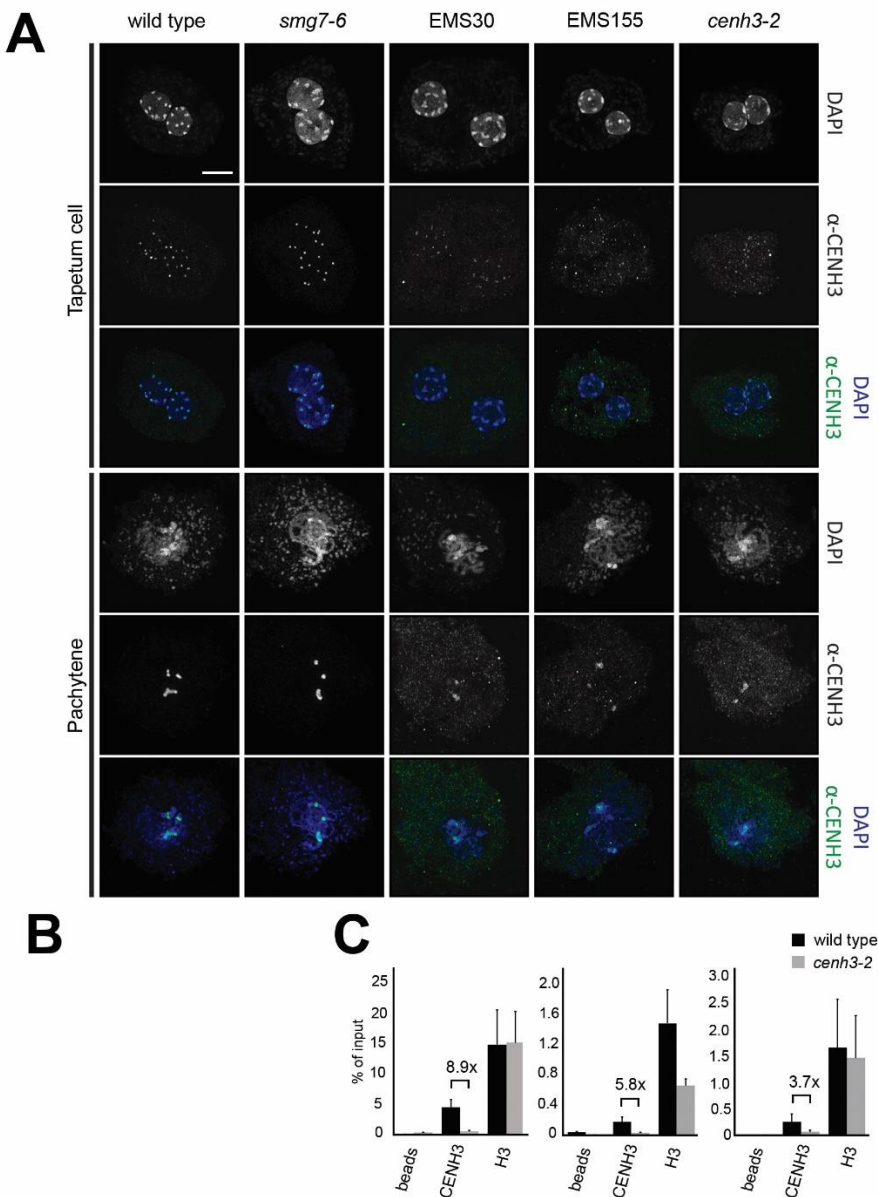

**Figure 7. Effect of *cenh3-2* mutation on the localization of CENH3 on Arabidopsis centromeres. (A)** Immunodetection of CENH3 in PMCs and tapetum cells using  $\alpha$ -CENH3 antibody (green); DNA is counterstained with DAPI (blue). Longer exposure times for EMS30, EMS155, and *cenh3-2* were applied to detect the signal. Scale bar corresponds to 5  $\mu$ m. **(B)** Association of CENH3 with the CEN180 satellite repeat determined by chromatin immunoprecipitation with CENH3 antibody and dot blot hybridization. Antibody against histone H3 was used as a control. **(C)** Quantification of the CEN180 repeat in the ChIP experiments by qPCR. Error bars represent standard deviation of three technical replicates. Three independent experiments are presented.

Figure 8

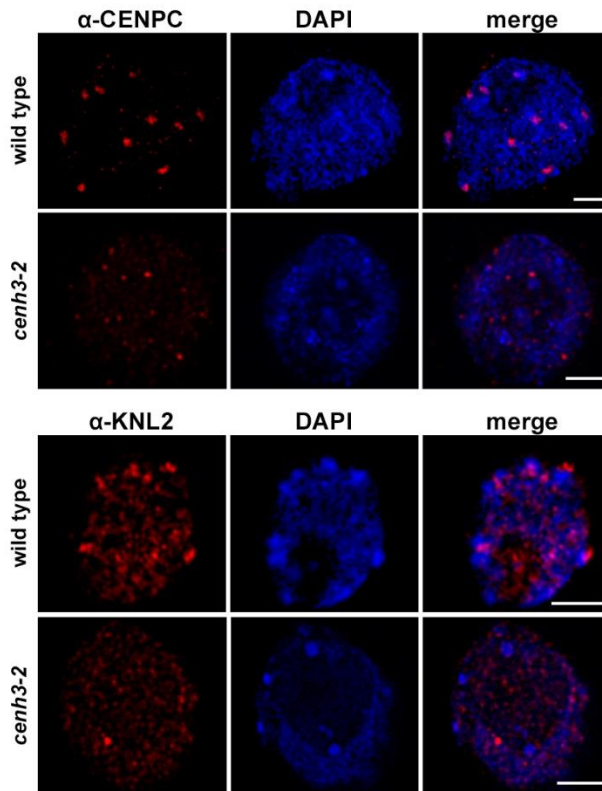

**Figure 8. Immunodetection of CENP-C and KNL2 in root nuclei of *cenh3-2* and wild type.** DNA is counter-stained with DAPI (blue). Scale bar = 2  $\mu$ m.

Figure 9

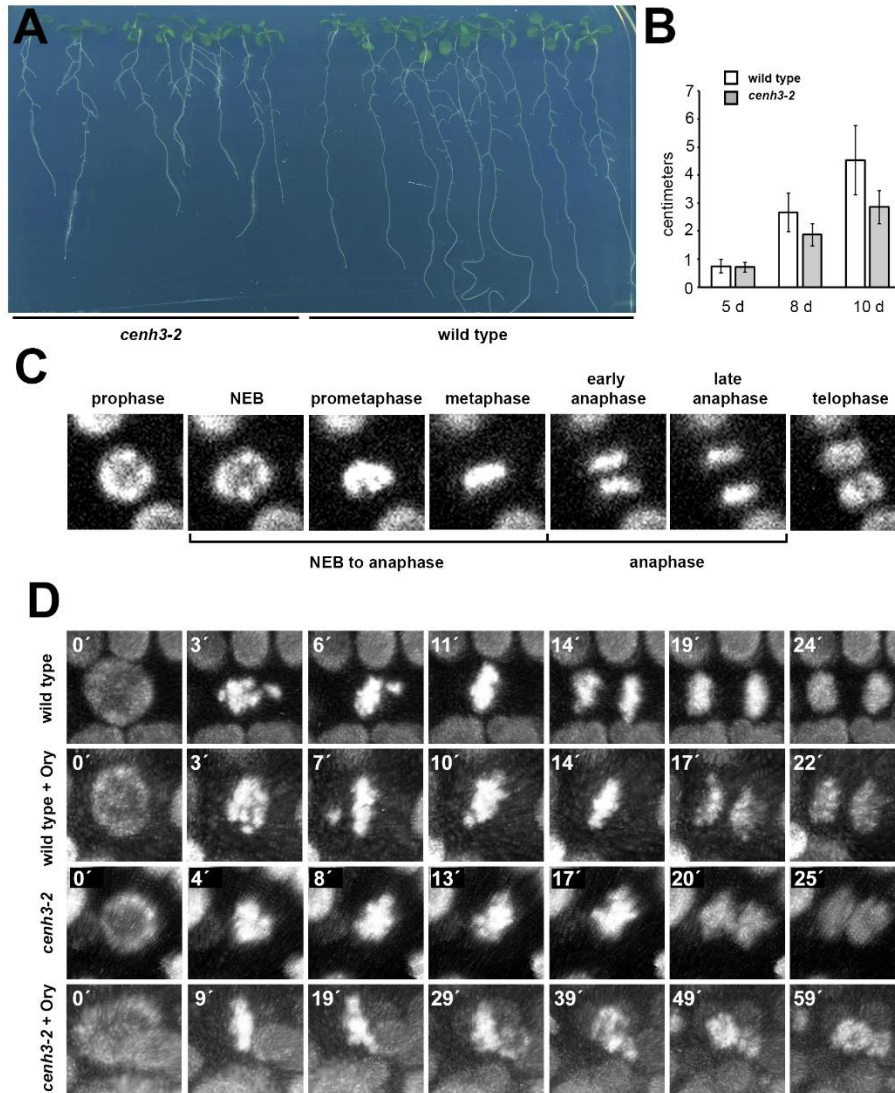

**Figure 9. Mitotic defects in *cenH3-2* mutants.** (A) Seedlings grown on vertically oriented agar plates for 10 d after germination. (B) Dynamics of root growth on vertical agar plate. Error bars represent standard deviations (n = 18). (C) An example of mitotic progression in a root cell visualized by the HTA10:RFP marker. Classification of stages whose duration was quantified in Table 1 is indicated. (D) Time-lapse series of mitotic nuclei from wild type and *cenH3-2* plants that were treated with 1.5  $\mu$ M oryzalin (Ory) during the experiment.
